# Supplementary material for: LIDAR measurements of clouds
Source: MDPI journal article supplement (doi:10.3390/ph15010098), 1987-01-01
Supplement: s1 [file s1]

# Supplementary Materials

## Inclusion Scenarios and Conformational Flexibility of the SSRI Paroxetine as Perceived from Polymorphism of $\beta$ -Cyclodextrin–Paroxetine Complex

Thammarat Aree

Department of Chemistry, Faculty of Science, Chulalongkorn University, Bangkok 10330, Thailand; athammar@chula.ac.th; ORCID: 0000-0002-7298-7401; Tel.: +66-2-2187584; Fax: +66-2-2187598

**Supplementary materials available:**

### I. Crystallographic data

**Table S1.** X-ray single crystal data collection and refinement statistics of  $\beta$ -CD–PXT HCl (form II).

**Table S2.** Selected geometrical parameters of  $\beta$ -CD–PXT HCl (form II).

**Table S3.** Hydrogen bond parameters and  $\pi\cdots\pi$  interactions in  $\beta$ -CD·PXT·HCl·0.4EtOH·7H<sub>2</sub>O.

### II. Computational data

**Table S4.** Hydrogen bond parameters in 1:1 and 2:1  $\beta$ -CD–PXT inclusion complexes from DFT full-geometry optimization.

**Table S5.** Stabilization and interaction energies of 1:1 and 2:1  $\beta$ -CD–PXT inclusion complexes from DFT full-geometry optimization.

**Table S6.** Dispersion- and BSSE-corrected interaction energies of 1:1 and 2:1  $\beta$ -CD–PXT inclusion complexes from DFT/B97D calculations.

### III. References

## I. Crystallographic data

**Table S1.** X-ray single crystal data collection and refinement statistics of  $\beta$ -CD-PXT HCl (form II).

|                                                                                                                | $\beta$ -CD-Paroxetine HCl                                                                                                                                                  |
|----------------------------------------------------------------------------------------------------------------|-----------------------------------------------------------------------------------------------------------------------------------------------------------------------------|
| Abbreviated formula                                                                                            | $\beta$ -CD·PXT·HCl·0.4EtOH·7H <sub>2</sub> O                                                                                                                               |
| Chemical formula                                                                                               | (C <sub>6</sub> H <sub>10</sub> O <sub>5</sub> ) <sub>7</sub> ·C <sub>19</sub> H <sub>20</sub> FNO <sub>3</sub> ·HCl·0.4(C <sub>2</sub> H <sub>6</sub> O)·7H <sub>2</sub> O |
| Formula weight                                                                                                 | 1635.25                                                                                                                                                                     |
| Crystal habit, color                                                                                           | Thick plate, colorless                                                                                                                                                      |
| Crystal size [mm]                                                                                              | 0.32 × 0.34 × 0.44                                                                                                                                                          |
| Crystal system, space group                                                                                    | Triclinic, <i>P</i> 1 (No. 1)                                                                                                                                               |
| <i>a</i> , <i>b</i> , <i>c</i> [Å]                                                                             | 11.4958(3), 12.3750(4), 15.0433(5)                                                                                                                                          |
| $\alpha$ , $\beta$ , $\gamma$ [°]                                                                              | 111.979(1), 95.325(1), 100.104(1)                                                                                                                                           |
| <i>V</i> [Å <sup>3</sup> ]                                                                                     | 1924.09(10)                                                                                                                                                                 |
| <i>Z</i>                                                                                                       | 1                                                                                                                                                                           |
| <i>D<sub>c</sub></i> [g cm <sup>-3</sup> ]                                                                     | 1.411                                                                                                                                                                       |
| $\mu$ [mm <sup>-1</sup> ]                                                                                      | 0.156                                                                                                                                                                       |
| <i>F</i> (000)                                                                                                 | 864                                                                                                                                                                         |
| Diffractometer                                                                                                 | APEXII Kappa CCD (Bruker)                                                                                                                                                   |
| Wavelength [Å]                                                                                                 | MoK $\alpha$ , 0.71073                                                                                                                                                      |
| <i>T</i> [K]                                                                                                   | 296(2)                                                                                                                                                                      |
| Data collection                                                                                                | $\omega$ - $\phi$ scan, 1.0° step, 8 s expose                                                                                                                               |
| Frames collected                                                                                               | 1376                                                                                                                                                                        |
| $\theta$ range [°]                                                                                             | 2.14–30.53                                                                                                                                                                  |
| Resolution [Å]                                                                                                 | 0.70                                                                                                                                                                        |
| Completeness [%], <i>R</i> <sub>int</sub>                                                                      | 99.8, 0.0296                                                                                                                                                                |
| Reflns collected / unique / observed                                                                           | 67270 / 23458 / 14844                                                                                                                                                       |
| Data / parameters / restraints                                                                                 | 23458, 1007, 31                                                                                                                                                             |
| <i>R</i> <sub>1</sub> <sup>a</sup> , <i>wR</i> <sub>2</sub> [ <i>I</i> > 2 $\sigma$ ( <i>I</i> )] <sup>b</sup> | 0.0633, 0.1582                                                                                                                                                              |
| <i>R</i> <sub>1</sub> , <i>wR</i> <sub>2</sub> [all data], GoF                                                 | 0.1061, 0.1854, 1.017                                                                                                                                                       |
| $\Delta\rho_{\min}$ , $\Delta\rho_{\max}$ [e Å <sup>-3</sup> ]                                                 | −0.42, 0.48                                                                                                                                                                 |
| Flack parameter ( <i>x</i> )                                                                                   | 0.03(2)                                                                                                                                                                     |
| CCDC number                                                                                                    | 2115511                                                                                                                                                                     |

<sup>a,b</sup>  $R = \sum ||F_o| - |F_c|| / \sum |F_o|$ ;  $wR = \sum \{w(F_o^2 - F_c^2)^2 / \sum w(F_o^2)^2\}^{1/2}$ .

**Table S2.** Selected geometrical parameters of  $\beta$ -CD–PXT HCl (form II).

| Residue<br><i>n</i> | $Q$ [Å] <sup>a</sup><br>$\theta$ [°] <sup>a</sup> | $\tau$ [°] <sup>b</sup> | $\phi^c, \psi^c$<br>[°]                                                                                   | O4 dev.<br>[Å] <sup>e</sup> | O4 dist.<br>[Å] <sup>f</sup>                                                                             | O3O2 dist.<br>[Å] <sup>h</sup> | $\chi^i, \omega^i$<br>[°]                                                                     |
|---------------------|---------------------------------------------------|-------------------------|-----------------------------------------------------------------------------------------------------------|-----------------------------|----------------------------------------------------------------------------------------------------------|--------------------------------|-----------------------------------------------------------------------------------------------|
| 1                   | 0.572(8)<br>3.0(8)                                | 6.0(2)                  | 110.4(4)<br>–116.6(4)                                                                                     | 0.098(2)                    | 4.467(4)<br>4.991(2)                                                                                     | 2.684(5)                       | 56.9(4)<br>–63.3(4)                                                                           |
| 2                   | 0.555(9)<br>2.2(9)                                | 11.5(2)                 | 116.5(3)<br>–112.6(4)                                                                                     | 0.078(2)                    | 4.313(3)<br>5.066(2)                                                                                     | 2.759(5)                       | 58.1(7) <sup>j</sup> 52.9(12) <sup>k</sup><br>–70.2(7) <sup>j</sup> –60.2(11) <sup>k</sup>    |
| 3                   | 0.559(9)<br>1.3(9)                                | 12.4(2)                 | 113.3(3)<br>–112.5(4)                                                                                     | –0.144(2)                   | 4.416(4)<br>5.059(3)                                                                                     | 2.727(5)                       | –176.7(7) <sup>m</sup> –160.3(13) <sup>n</sup><br>68.4(10) <sup>m</sup> 65.4(20) <sup>n</sup> |
| 4                   | 0.546(9)<br>3.0(9)                                | 1.8(3)                  | 106.8(4)<br>–124.2(4)                                                                                     | –0.026(3)                   | 4.338(5)<br>5.054(3)                                                                                     | 2.966(6)                       | 58.4(5)<br>–63.3(4)                                                                           |
| 5                   | 0.550(9)<br>4.8(9)                                | 21.1(2)                 | 116.2(4)<br>–97.7(5)                                                                                      | 0.183(2)                    | 4.395(4)<br>4.974(3)                                                                                     | 2.731(5)                       | 68.0(5)<br>–53.8(5)                                                                           |
| 6                   | 0.572(9)<br>3.9(9)                                | 6.0(1)                  | 109.9(4)<br>–130.3(4)                                                                                     | –0.092(2)                   | 4.446(4)<br>5.136(3)                                                                                     | 2.826(6)                       | 63.3(5)<br>–57.3(5)                                                                           |
| 7                   | 0.544(9)<br>4.1(9)                                | 8.4(2)                  | 111.4(4)<br>–110.7(4)<br><i>112.1<sup>d</sup></i><br><i>–114.9<sup>d</sup></i><br><i>–2.8<sup>d</sup></i> | –0.097(2)                   | 4.293(4)<br>5.038(2)<br><i>0.174<sup>g</sup></i><br><i>0.162<sup>g</sup></i><br><i>0.868<sup>g</sup></i> | 2.799(5)                       | 45.3(9) <sup>p</sup> 63.7(11) <sup>q</sup><br>–76.6(8) <sup>p</sup> –58.2(11) <sup>q</sup>    |

<sup>a</sup> Puckering parameters of an ideal cyclohexane chair (for  $R(\text{C}–\text{C}) = 1.54$  Å) has puckering amplitude  $Q = 0.63$  Å and angle describing the polar position  $\theta = 0^\circ$  [1].

<sup>b</sup> Tilt angle — interplanar angle of the plane through C1(*n*), C4(*n*), O4(*n*) and O4(*n* – 1) against the O4 plane.

<sup>c</sup> Endocyclic torsion angles  $\phi$  and  $\psi$  at glycosidic O4, defined as O5(*n* + 1)–C1(*n* + 1)–O4(*n*)–C4(*n*) and C1(*n* + 1)–O4(*n*)–C4(*n*)–C5(*n*), respectively.

<sup>d</sup> Averages of  $\phi$  and  $\psi$  are in *italics*; for the  $\beta$ -CD roundness, the sum of averages should be zero [2].

<sup>e</sup> Deviation of glycosidic O4 atoms from the least-squares plane through the seven O4 atoms.

<sup>f</sup> O4(*n*)...O4(*n* – 1) and O4(*n*)...centroid distances.

<sup>g</sup> Ranges of the O4(*n*)...O4(*n* – 1), O4(*n*)...centroid distances and the average of their ratios are in *italics*; for an ideal heptagon, the ratio is 0.868.

<sup>h</sup> O3(*n*)...O2(*n* + 1) distance

<sup>i</sup> Exocyclic torsion angles  $\chi$  and  $\omega$  are defined as C4–C5–C6–O6 and O5–C5–C6–O6, respectively.

<sup>j,k</sup> Twofold disordered C62–H<sub>2</sub>–O62–H group with occupancy factors 0.61 and 0.39 for respective sites A and B.

<sup>m,n</sup> Twofold disordered C63–H<sub>2</sub>–O63–H group with occupancy factors 0.64 and 0.36 for respective sites A and B.

<sup>p,q</sup> Twofold disordered O67–H group with occupancy factors 0.59 and 0.41 for respective sites A and B.

**Table S3.** (a) Hydrogen bond parameters in  $\beta$ -CD·PXT·HCl·0.4EtOH·7H<sub>2</sub>O [ $\text{\AA}$ ,  $^\circ$ ].

| D–H...A                                                                | D–H  | H...A | D...A     | $\angle(\text{DHA})$ | D–H...A                                                                          | D–H  | H...A | D...A     | $\angle(\text{DHA})$ |
|------------------------------------------------------------------------|------|-------|-----------|----------------------|----------------------------------------------------------------------------------|------|-------|-----------|----------------------|
| <b><math>\beta</math>-CD–<math>\beta</math>-CD</b>                     |      |       |           |                      | O64–H...O7WA                                                                     | 0.82 | 1.80  | 2.59(2)   | 164.5                |
| O21–H...O37                                                            | 0.82 | 2.14  | 2.799(5)  | 137.3                | O64–H...O7WB                                                                     | 0.82 | 1.95  | 2.728(11) | 157.2                |
| O31–H...O22                                                            | 0.82 | 1.88  | 2.684(5)  | 167.5                | O64–H...O7WC                                                                     | 0.82 | 2.09  | 2.864(16) | 156.6                |
| O61–H...O64 <sup>ia</sup>                                              | 0.82 | 1.97  | 2.775(5)  | 168.7                | O26–H...O1W <sup>viii</sup>                                                      | 0.82 | 1.90  | 2.698(6)  | 163.0                |
| O22–H...O56 <sup>iii</sup>                                             | 0.82 | 1.97  | 2.788(4)  | 175.7                | O36–H...O7WA <sup>ix</sup>                                                       | 0.82 | 2.42  | 2.93(2)   | 121.2                |
| O32–H...O23                                                            | 0.82 | 1.99  | 2.759(5)  | 156.7                | O66–H...Cl1 <sup>x</sup>                                                         | 0.82 | 2.29  | 3.084(5)  | 163.4                |
| O33–H...O24                                                            | 0.82 | 1.92  | 2.726(5)  | 167.4                | O37–H...O2W <sup>ix</sup>                                                        | 0.82 | 2.04  | 2.756(7)  | 144.9                |
| O63A–H...O31 <sup>ivb</sup>                                            | 0.82 | 1.81  | 2.597(8)  | 161.2                | O67A–H...O3WA <sup>ix</sup>                                                      | 0.82 | 1.91  | 2.730(18) | 172.8                |
| O34–H...O25                                                            | 0.82 | 2.23  | 2.966(6)  | 148.7                | O67B–H...O3WB <sup>ix</sup>                                                      | 0.82 | 2.48  | 3.09(3)   | 132.8                |
| O35–H...O26                                                            | 0.82 | 1.91  | 2.731(5)  | 176.7                | O1W–H1...O33 <sup>xi</sup>                                                       | 0.96 | 2.15  | 2.956(6)  | 140.3                |
| O65–H...O32 <sup>vii</sup>                                             | 0.82 | 2.06  | 2.831(5)  | 155.6                | O2W–H1...O25 <sup>ii</sup>                                                       | 0.96 | 1.96  | 2.827(7)  | 148.9                |
| O36–H...O27                                                            | 0.82 | 2.11  | 2.826(6)  | 145.5                | <b>PXT–<math>\beta</math>-CD/<math>\text{H}_2\text{O}/\text{Cl}</math></b>       |      |       |           |                      |
| O27–H...O65 <sup>ix</sup>                                              | 0.82 | 1.95  | 2.766(5)  | 176.2                | N1X–H1...O61 <sup>viii</sup>                                                     | 0.89 | 1.95  | 2.792(6)  | 158.1                |
| <b><math>\beta</math>-CD–<math>\text{H}_2\text{O}/\text{Cl}</math></b> |      |       |           |                      | N1X–H1...Cl1                                                                     | 0.89 | 2.38  | 3.131(5)  | 141.6                |
| O62A–H...O4WA <sup>ivc</sup>                                           | 0.82 | 2.17  | 2.825(11) | 137.0                | N1X–H1...O6WA <sup>iii</sup>                                                     | 0.89 | 2.57  | 3.16(3)   | 124.9                |
| O23–H...O3WA <sup>v</sup>                                              | 0.82 | 1.96  | 2.771(9)  | 173.2                | O25–H...Cg2(C) <sup>d</sup>                                                      | 0.82 | 3.410 | 4.228     | 176.0                |
| O23–H...O3WB <sup>v</sup>                                              | 0.82 | 2.50  | 3.250(13) | 152.0                | C31–H...Cg3(B) <sup>d</sup>                                                      | 0.98 | 3.623 | 4.548     | 158.2                |
| O63B–H...O4WB <sup>iv</sup>                                            | 0.82 | 2.21  | 2.815(18) | 130.8                | <b><math>\text{H}_2\text{O}</math>–<math>\text{H}_2\text{O}/\text{Cl}</math></b> |      |       |           |                      |
| O24–H...O4WA <sup>vi</sup>                                             | 0.82 | 2.14  | 2.794(7)  | 137.1                | O1W–H2...Cl1 <sup>x</sup>                                                        | 0.96 | 2.28  | 3.154(5)  | 151.0                |
| O24–H...O4WB <sup>vi</sup>                                             | 0.82 | 1.96  | 2.700(13) | 150.7                | O2W–H2...O5W                                                                     | 0.96 | 1.84  | 2.74(3)   | 155.6                |

<sup>a</sup> Equivalent positions: (i)  $x + 1, y + 1, z$ ; (ii)  $x + 1, y, z$ ; (iii)  $x, y, z - 1$ ; (iv)  $x, y - 1, z$ ; (v)  $x - 1, y, z - 1$ ;

(vi)  $x - 1, y - 1, z$ ; (vii)  $x, y, z + 1$ ; (viii)  $x - 1, y, z$ ; (ix)  $x, y + 1, z$ ; (x)  $x + 1, y, z + 1$ ; (xi)  $x + 1, y + 1, z + 1$ .

<sup>b</sup> Twofold disordered C62–H<sub>2</sub>–O62–H group of  $\beta$ -CD with occupancy factors 0.61 and 0.39 for respective sites A and B.

Twofold disordered C63–H<sub>2</sub>–O63–H group of  $\beta$ -CD with occupancy factors 0.64 and 0.36 for respective sites A and B.

Twofold disordered O67–H group of  $\beta$ -CD with occupancy factors 0.59 and 0.41 for respective sites A and B.

<sup>c</sup> Site occupancy factors (SOFs) are as follows:

7 water molecules are distributed over 14 sites: 1.0 (O1W, O2W); 0.6 (O3WA, O4WA, O7WD);

0.4 (O3WB, O4WB, O6WB, O7WC, O8W); and 0.3 (O5W, O6WA, O7WA, O7WB).

EtOH: 0.4

Fully occupied chloride: 1.0 (Cl1)

<sup>d</sup> Cg1 = D-ring (O13X–C12X–C16X–O15X–C14X)

Cg2 = C-ring (C9X–C10X–C11X–C12X–C16X–C17X)

Cg3 = B-ring (C18X–C19X–C20X–C21X–C22X–C23X)

**(b)  $\pi \cdots \pi$  interactions in  $\beta$ -CD·PXT·HCl·0.4EtOH·7H<sub>2</sub>O [ $\text{\AA}$ ,  $^\circ$ ].**

| $Cg(I)$ | $Cg(J)$            | $Cg-Cg$  | Alpha   | $CgI\_Perp$ | $CgJ\_Perp$ | Type         |
|---------|--------------------|----------|---------|-------------|-------------|--------------|
| $Cg1$   | $Cg3(x - 1, y, z)$ | 5.595(6) | 69.8(7) | 1.938(6)    | 3.790(3)    | Edge-to-face |
| $Cg3$   | $Cg2(x, y, z)$     | 5.457(3) | 65.7(3) | 0.343(3)    | 4.799(3)    | Edge-to-face |

Note:

-  $Cg(I)$  = Plane number  $I$ ; for  $Cg1$ ,  $Cg2$ , and  $Cg3$ , see above.

- Alpha = Interplanar angle between planes  $I$  and  $J$  ( $^\circ$ )

-  $Cg-Cg$  = Distance between ring centroids ( $\text{\AA}$ )

-  $CgI\_Perp$  = Perpendicular distance of  $Cg(I)$  on ring  $J$  ( $\text{\AA}$ )

-  $CgJ\_Perp$  = Perpendicular distance of  $Cg(J)$  on ring  $I$  ( $\text{\AA}$ )

## II. Computational data

**Table S4.** Hydrogen bond parameters in 1:1 and 2:1  $\beta$ -CD-PXT inclusion complexes from DFT full-geometry optimization [ $\text{\AA}$ ,  $^\circ$ ].<sup>a</sup>

| D-H...A                  | D-H  | H...A | D...A       | $\angle(\text{DHA})$ | D-H...A                       | D-H  | H...A | D...A | $\angle(\text{DHA})$ |
|--------------------------|------|-------|-------------|----------------------|-------------------------------|------|-------|-------|----------------------|
| 1:1 <sup>b</sup>         |      |       |             |                      |                               |      |       |       |                      |
| $\beta$ -CD- $\beta$ -CD |      |       |             |                      | $\beta$ -CD-PXT               |      |       |       |                      |
|                          |      |       | $\beta$ -CD | conformation         |                               |      |       |       |                      |
|                          |      |       | Distorted   | round                |                               |      |       |       |                      |
| O21-H...O37              | 0.98 | 2.05  | 2.98        | 157.8                | O35-H...O13X                  | 0.98 | 1.97  | 2.92  | 162.3                |
| O31-H...O22              | 0.98 | 1.99  | 2.95        | 166.9                | O25-H...Cg2(C) <sup>c</sup>   | 0.98 | 3.74  | 4.34  | 121.8                |
| O32-H...O23              | 0.98 | 1.96  | 2.92        | 167.4                | C31-H...Cg3(B)                | 1.10 | 3.66  | 4.74  | 165.3                |
| O62-H...O53              | 0.97 | 2.14  | 3.02        | 149.2                |                               |      |       |       |                      |
| O33-H...O24              | 0.98 | 1.86  | 2.82        | 165.7                |                               |      |       |       |                      |
| O25-H...O34              | 0.98 | 1.88  | 2.86        | 175.0                |                               |      |       |       |                      |
| O26-H...O35              | 0.99 | 1.87  | 2.84        | 168.3                |                               |      |       |       |                      |
| O27-H...O36              | 0.98 | 1.93  | 2.89        | 164.5                |                               |      |       |       |                      |
| 2:1 <sup>b</sup>         |      |       |             |                      |                               |      |       |       |                      |
| $\beta$ -CD- $\beta$ -CD |      |       |             |                      | $\beta$ -CD-PXT               |      |       |       |                      |
|                          |      |       | Distorted   | round                |                               |      |       |       |                      |
| O21_1-H...O37_1          | 0.99 | 1.82  | 2.81        | 171.1                | O61_2-H...N1P                 | 0.99 | 1.91  | 2.90  | 172.8                |
| O22_1-H...O31_1          | 0.98 | 2.10  | 2.99        | 150.8                | C36_1-H...Cg2(C) <sup>c</sup> | 1.10 | 3.57  | 4.65  | 168.3                |
| O32_1-H...O37_2          | 0.99 | 1.78  | 2.75        | 166.5                | C36_2-H...Cg3(B)              | 1.10 | 3.50  | 4.55  | 161.1                |
| O23_1-H...O32_1          | 0.98 | 1.97  | 2.90        | 155.9                |                               |      |       |       |                      |
| O33_1-H...O36_2          | 0.99 | 1.89  | 2.88        | 174.6                |                               |      |       |       |                      |
| O24_1-H...O33_1          | 0.99 | 1.79  | 2.78        | 177.1                |                               |      |       |       |                      |
| O34_1-H...O25_1          | 0.99 | 1.82  | 2.79        | 166.8                |                               |      |       |       |                      |
| O25_1-H...O34_2          | 0.98 | 1.91  | 2.76        | 143.5                |                               |      |       |       |                      |
| O35_1-H...O24_2          | 0.99 | 1.80  | 2.72        | 154.2                |                               |      |       |       |                      |
| O65_1-H...O56_1          | 0.97 | 2.07  | 2.96        | 149.8                |                               |      |       |       |                      |
| O26_1-H...O35_1          | 0.99 | 1.84  | 2.82        | 169.7                |                               |      |       |       |                      |
| O36_1-H...O27_1          | 0.99 | 1.87  | 2.85        | 175.5                |                               |      |       |       |                      |
| O66_1-H...O67_1          | 0.98 | 2.14  | 3.05        | 153.5                |                               |      |       |       |                      |
| O27_1-H...O32_2          | 0.99 | 1.85  | 2.73        | 148.2                |                               |      |       |       |                      |
| O37_1-H...O22_2          | 0.99 | 1.79  | 2.73        | 157.9                |                               |      |       |       |                      |
| O31_2-H...O31_1          | 0.98 | 1.95  | 2.92        | 166.0                |                               |      |       |       |                      |
| O22_2-H...O31_2          | 0.99 | 1.87  | 2.84        | 166.2                |                               |      |       |       |                      |
| O32_2-H...O23_2          | 0.99 | 1.79  | 2.77        | 169.3                |                               |      |       |       |                      |
| O23_2-H...O36_1          | 0.98 | 1.85  | 2.72        | 145.1                |                               |      |       |       |                      |
| O33_2-H...O26_1          | 0.99 | 1.77  | 2.71        | 156.0                |                               |      |       |       |                      |
| O24_2-H...O33_2          | 0.99 | 1.82  | 2.80        | 170.1                |                               |      |       |       |                      |
| O34_2-H...O25_2          | 0.99 | 1.78  | 2.77        | 172.3                |                               |      |       |       |                      |
| O25_2-H...O34_1          | 0.98 | 1.91  | 2.78        | 146.7                |                               |      |       |       |                      |
| O35_2-H...O24_1          | 0.99 | 1.71  | 2.68        | 167.6                |                               |      |       |       |                      |
| O26_2-H...O35_2          | 0.98 | 1.92  | 2.89        | 169.9                |                               |      |       |       |                      |
| O36_2-H...O27_2          | 0.98 | 2.01  | 2.97        | 165.0                |                               |      |       |       |                      |
| O37_2-H...O21_2          | 0.98 | 1.88  | 2.85        | 169.5                |                               |      |       |       |                      |
| O67_2-H...O51_2          | 0.97 | 2.17  | 2.97        | 138.7                |                               |      |       |       |                      |

<sup>a</sup> DFT energy minimization in vacuum at the B3LYP/6-31+G\*/4-31G level, see also Table S5.

<sup>b</sup> X-ray structures of the 1:1  $\beta$ -CD-PXT (form II) and 2:1  $\beta$ -CD-PXT (form I; [3]) with PXT in neutral form were used as starting models.

<sup>c</sup> PXT base in the 1:1 and 2:1  $\beta$ -CD-PXT inclusion complexes, which are respectively labeled X and P

Cg1 = D-ring (O13X-C12X-C16X-O15X-C14X)

Cg2 = C-ring (C9X-C10X-C11X-C12X-C16X-C17X)

Cg3 = B-ring (C18X-C19X-C20X-C21X-C22X-C23X)

Cg1 = D-ring (O13P-C12P-C16P-O15P-C14P)

Cg2 = C-ring (C9P-C10P-C11P-C12P-C16P-C17P)

Cg3 = B-ring (C18P-C19P-C20P-C21P-C22P-C23P)

**Table S5.** Stabilization and interaction energies of 1:1 and 2:1  $\beta$ -CD–PXT inclusion complexes from DFT full-geometry optimization. <sup>a</sup>

|                                                                                     | 1:1 <sup>b</sup>        | 2:1 <sup>b</sup>      |
|-------------------------------------------------------------------------------------|-------------------------|-----------------------|
| $E_{\text{cpx}}^{\text{c}}$                                                         | –5388.30855             | –9661.36284           |
| $E_{\beta\text{-CD}_{\text{opt}}}^{\text{d}} \{E_{2\beta\text{-CD}_{\text{opt}}}\}$ | –4272.96405             | {–8546.03560}         |
| $E_{\text{D}_{\text{opt}}}$                                                         | –1115.32034             | –1115.31793           |
| $E_{\beta\text{-CD}_{\text{sp}}} \{E_{2\beta\text{-CD}_{\text{sp}}}\}$              | –4272.96123             | {–8546.02372}         |
| $E_{\text{D}_{\text{sp}}}$                                                          | –1115.31830             | –1115.31277           |
| $\Delta E_{\text{stb}}$ [Hartree] <sup>e</sup>                                      | –0.02401                | –0.00931              |
| $\Delta E_{\text{stb}}$ [kcal mol <sup>–1</sup> ]                                   | –15.16                  | –5.84                 |
| $\Delta E_{\text{int}}$ [Hartree] <sup>f</sup>                                      | –0.02902                | –0.02635              |
| $\Delta E_{\text{int}}$ [kcal mol <sup>–1</sup> ]                                   | –18.21                  | –16.54                |
| Host-guest interactions                                                             | O–H...O, C/O–H... $\pi$ | O–H...N, C–H... $\pi$ |

<sup>a</sup> DFT/B3LYP calculations in the gas phase with mixed basis sets 4–31G for C atoms and 6–31+G\* for H, N, O, F atoms were carried out using program GAUSSIAN09 [4].

<sup>b</sup> X-ray structures of the 1:1  $\beta$ -CD–PXT (form II) and 2:1  $\beta$ -CD–PXT (form I; [3]) with PXT in neutral form were used as starting models, see also Tables S4 and S6.

<sup>c</sup> Original unit of  $E$  is Hartree [1 H = 627.5 kcal mol<sup>–1</sup>].

<sup>d</sup>  $E_{\beta\text{-CD}_{\text{opt}}}$  in vacuum of the uncomplexed  $\beta$ -CD·12H<sub>2</sub>O [5] is –4272.96662 H.

<sup>e,f</sup> Stabilization energy,  $\Delta E_{\text{stb}} = E_{\text{cpx}} - (E_{\beta\text{-CD}_{\text{opt}}} + E_{\text{D}_{\text{opt}}})$  and interaction energy,  $\Delta E_{\text{int}} = E_{\text{cpx}} - (E_{\beta\text{-CD}_{\text{sp}}} + E_{\text{D}_{\text{sp}}})$ , where  $E_{\text{cpx}}$ ,  $E_{\beta\text{-CD}_{\text{opt}}}$  and  $E_{\text{D}_{\text{opt}}}$  are the molecular energies from full optimization of complex, host  $\beta$ -CD and drug PXT in the free base form, respectively;  $E_{\beta\text{-CD}_{\text{sp}}}$  and  $E_{\text{D}_{\text{sp}}}$  are the corresponding single-point energies in the complexed states.

**Table S6.** Dispersion- and BSSE-corrected interaction energies of 1:1 and 2:1  $\beta$ -CD–PXT inclusion complexes from DFT/B97D calculations. <sup>a</sup>

|                                                                                                 | 1:1         | 2:1           |
|-------------------------------------------------------------------------------------------------|-------------|---------------|
| B97D                                                                                            |             |               |
| $E_{\text{cpx}}$                                                                                | –5385.02492 | –9655.57586   |
| $E_{\beta\text{-CD}_{\text{sp}}} \{E_{2\beta\text{-CD}_{\text{opt}}}\}$                         | –4270.36709 | {–8540.87255} |
| $E_{\text{D}_{\text{sp}}}$                                                                      | –1114.58685 | –1114.58275   |
| $\Delta E_{\text{int}}$ [Hartree]                                                               | –0.07098    | –0.12056      |
| $\Delta E_{\text{int}}$ [kcal mol <sup>–1</sup> ]                                               | –44.54      | –75.65        |
| $\Delta\Delta E_{\text{int}}$ [kcal mol <sup>–1</sup> ] <sup>d</sup>                            | 31.12       | 0.00          |
| B97D+BSSE                                                                                       |             |               |
| $E_{\text{cpx}_{\text{BSSE}}}$                                                                  | –5385.00925 | –9655.54649   |
| $E_{\beta\text{-CD}(\text{cpx})_{\text{sp}}} \{E_{2\beta\text{-CD}(\text{cpx})_{\text{sp}}}\}$  | –4270.37175 | {–8540.88338} |
| $E_{\text{D}(\text{cpx})_{\text{sp}}}$                                                          | –1114.59786 | –1114.60128   |
| $\Delta E_{\text{BSSE}}$ [Hartree] <sup>b</sup>                                                 | 0.01567     | 0.02937       |
| $\Delta E_{\text{BSSE}}$ [kcal mol <sup>–1</sup> ] (% contribution to $\Delta E_{\text{int}}$ ) | 9.83 (22%)  | 18.43 (24%)   |
| $\Delta E_{\text{int}_{\text{BSSE}}}$ [Hartree] <sup>c</sup>                                    | –0.05531    | –0.09120      |
| $\Delta E_{\text{int}_{\text{BSSE}}}$ [kcal mol <sup>–1</sup> ]                                 | –34.71      | –57.23        |
| $\Delta\Delta E_{\text{int}_{\text{BSSE}}}$ [kcal mol <sup>–1</sup> ] <sup>d</sup>              | 22.52       | 0.00          |

<sup>a</sup> DFT/B97D calculations in the gas phase with mixed basis sets 4–31G for C atoms and 6–31+G\* for H, N, O, F atoms were carried out using program GAUSSIAN09 [4].

DFT/B3LYP-optimized structures were used for single-point energy calculations, see also Table S7.

<sup>b</sup> The basis set superposition error (BSSE) energy by counterpoise correction [6],

$$\Delta E_{\text{BSSE}} = E_{\text{cpx}_{\text{BSSE}}} - E_{\text{cpx}} = [E_{\beta\text{-CD}_{\text{sp}}} - E_{\beta\text{-CD}(\text{cpx})_{\text{sp}}}] + [E_{\text{D}_{\text{sp}}} - E_{\text{D}(\text{cpx})_{\text{sp}}}]$$

where  $E_{\text{cpx}_{\text{BSSE}}}$  and  $E_{\text{cpx}}$  are corrected and uncorrected complex energies, respectively.

<sup>c</sup> BSSE-corrected interaction energy,  $\Delta E_{\text{int}_{\text{BSSE}}} = E_{\text{cpx}} - (E_{\beta\text{-CD}(\text{cpx})_{\text{sp}}} + E_{\text{D}(\text{cpx})_{\text{sp}}}) = \Delta E_{\text{int}} + \Delta E_{\text{BSSE}}$

where  $E_{\beta\text{-CD}(\text{cpx})_{\text{sp}}}$  and  $E_{\text{D}(\text{cpx})_{\text{sp}}}$  are energies of two components in the complex.

<sup>d</sup> Relative interaction energies ( $\Delta\Delta E_{\text{int}}$  and  $\Delta\Delta E_{\text{int}_{\text{BSSE}}}$ ) compared to the 2:1  $\beta$ -CD–PXT complex [3].

### III. References

1. Cremer, D.T.; Pople, J.A. General definition of ring puckering coordinates. *J. Am. Chem. Soc.* **1975**, *97*, 1354–1358. <https://doi.org/10.1021/ja00839a011>.
2. French, A.D.; Johnson, G.P. Linkage and pyranosyl ring twisting in cyclodextrins. *Carbohydr. Res.* **2007**, *342*, 1223–1237. <https://doi.org/10.1016/j.carres.2007.02.033>.
3. Caira, M.R.; De Vries, E.; Nassimbeni, L.R.; Jacewicz, V.W. Inclusion of the antidepressant paroxetine in  $\beta$ -cyclodextrin. *J. Incl. Phenom. Macrocycl. Chem.* **2003**, *46*, 37–42. <https://doi.org/10.1023/A:1025622809025>.
4. Frisch, M.J.E.A.; Trucks, G.W.; Schlegel, H.B.; Scuseria, G.E.; Robb, M.A.; Cheeseman, J.R.; ... Nakatsuji, H. GAUSSIAN09, Revision A.01. Gaussian, Inc.; Wallingford, CT, 2009.
5. Lindner, K.; Saenger, W. Crystal and molecular structure of cyclohepta-amylose dodecahydrate. *Carbohydr. Res.* **1982**, *99*, 103–115. [https://doi.org/10.1016/S0008-6215\(00\)81901-1](https://doi.org/10.1016/S0008-6215(00)81901-1).
6. Boys, S.F.; Bernardi, F.J.M.P. The calculation of small molecular interactions by the differences of separate total energies. Some procedures with reduced errors. *Mol. Phys.* **1970**, *19*, 553–566. <https://doi.org/10.1080/00268977000101561>.
